# Supplementary material
Source: publisher figshare collection journal article supplement (https://frontiersin.figshare.com/ndownloader/files/23203004)
Supplement: Supplementary file [file 23203004]

|         |                                                                                                                                                                                                                          |
|---------|--------------------------------------------------------------------------------------------------------------------------------------------------------------------------------------------------------------------------|
| KP46615 | MEKYIYFICNKDVNIVLTDDYFFYYGLKQLTGLPLFHITYEGVVNKSIAIKHKRNIRVLVDSRIFYSGKWGGYKMLRGSLNMISQWMWLDVSGGGRFYPKGCDYDIYVNMQGNVKNNIEKLYFAFLKKNVSR<br>IVNHYPRLTKKEQAVLQCLLKNGGINEIKSQLKIEEKTLSQYQSKITRKFQCKRYIRFMYLSLNKEMVDERWLMPSI    |
| KP47507 | MEKYIYFICNKDVNIVLTDDYFFYYGLKQLTGLPLFHITYEGVVNKSIAIKHKRNIRVLVDSRIFYSGKWGGYKMLRGSLNMISQWMWLDVSGGGGFYPKGCDYDIYVNMQGNVKNNIEKLYFAFLKKNVSR<br>IVNHYPRLTKKEQAVLQCLLKNGGINEIKSQLKIEEKTLSQYQSKITRKFQCKRYIRFMYLSLNKEMVDERWLMPSI    |
| KP48359 | MEKYIYFICNKDVNIVLTDDYFFYYGLKQLTGLPLFHITYEGVVNKSIAIKHKRNIRVLVDSRIFYSGKWGGYKMLRGSLNMISQWMWLDVSGGGRFYPKGCDYDIYVNMQGNVKNNIEKLYFAFLKKNVSR<br>IVNHYPRLTKKEQAVLQCLLKNGGINEIKSQLKIEEKTLSQYQSKITRKFQCKRYIRFMYLSLNKEMVDERWLMPSI    |
| KP42223 | MEKYIYFMCNKDVTLVLTDDYYFYFGLKQLTGLPLVYITYEGSMDKPIVIKQKRNIIRVLVDSRIFYSGKWDGYKMLRKTLNMISQWMWLDISGGGEKFYPKGCDYDIYVNMQGNLKKNIEELYAYLKKNVSR<br>IGNHYPQLTKKEQIILQCLLSRREGIHELKSRLEKIEEKTLSCHRCITRKFQCKRFIRFMYLYNLNKEITDEKWCTSNT |
| KP39929 | MEKYIYFMCNKDVTLVLTDDYYFYFGLKQLTGLPLVYITYEGSMDKPIVIKQKRNIIRVLVDSRIFYSGKWDGYKMLRKTLNMISQWMWLDISGGGEKFYPKGCDYDIYVNMQGNLKKTLKSYIMHT                                                                                          |
| KP42338 | MEKYIYFMCNKDVTLVLTDDYYFYFGLKQLTGLPLVYITYEGSMDKPIVIKQKRNIIRVLVDSRIFYSGKWDGYKMLRKTLNMISQWMWLDISGGGEKFYPKGCDYDIYVNMQGNLKKTLKSYIMHT                                                                                          |
| KP29198 | MEKYIYFMCNKDVTLVLTDDYYFYFGLKQLTGLPLVYITYEGSMDKPIVIKQKRNIIRVLVDSRIFYSGKWDGYKMLRKTLNMISQWMWLDISGGGGSFILKGVIMTSMSTCKEI                                                                                                      |
| KP46050 | MEKYIYFMCNKDVTLVLTDDYYFYFGLKQLTGLPLVYITYEGSMDKPIVIKQKRNIIRVLVDSRIFYSGKWDGYKMLRKTLNMISQWMWLDISGGGRSFILKGVIMTSMSTCKEI                                                                                                      |
| KP31319 | MEKYIYFMCNKDVTLVLTDDYYFYFGLKQLTGLPLVYITYEGSMDKPIVIKQKRNIIRVLVDSRIFYSGKWDGYKMLRKTLNMISQWMWLDISGGGGRSFILKGVIMTSMSTCKEI                                                                                                     |
| KP46748 | MEKYIYFMCNKDVTLVLTDDYYFYFGLKQLTGLPLVYITYEGSMDKPIVIKQKRNIIRVLVDSRIFYSGKWDGYKMLRKTLNMISQWMWLDISGGGEVLS                                                                                                                     |
| KP48273 | MEKYIYFMCNKDVTLVLTDDYYFYFGLKQLTGLPLVYITYEGSMDKPIVIKQKRNIIRVLVDSRIFYSGKWDGYKMLRKTLNMISQWMWLDISGGGGEVLS                                                                                                                    |
